# Supplementary material
Source: HighWire-hosted journal article supplement (https://advances.sciencemag.org/content/suppl/2018/09/24/4.9.eaat2369)
Supplement: aat2369_SM.pdf [file aat2369_SM.pdf]

## Supplementary Materials for

### Evidence for precision grasping in Neandertal daily activities

Fotios Alexandros Karakostis, Gerhard Hotz, Vangelis Tourloukis, Katerina Harvati\*

\*Corresponding author. Email: katerina.harvati@ifu.uni-tuebingen.de

Published 26 September 2018, *Sci. Adv.* **4**, eaat2369 (2018)

DOI: 10.1126/sciadv.aat2369

#### This PDF file includes:

Fig. S1. PCA using eight entheses from the same anatomical side of each fossil, either left (L) or right (R), and the right side of the reference specimens, PC1 versus PC2.

Fig. S2. PCA using eight entheses from the same anatomical side of each fossil, either left (L) or right (R), and the right side of the reference specimens, PC2 versus PC3.

Fig. S3. PCA using seven entheses from the same anatomical side of each fossil and the left side of the reference specimens, PC1 versus PC2.

Table S1. Individual hand bone sets comprising the fossil samples.

Table S2. Descriptive statistics for the size-adjusted enthesal surface area measurements of the fossil specimens.

Table S3. Eigenvalues and factor loadings of the four PCAs on size-adjusted enthesal surface measurements.

Table S4. Statistics of the two discriminant function analyses.

References (56–63)

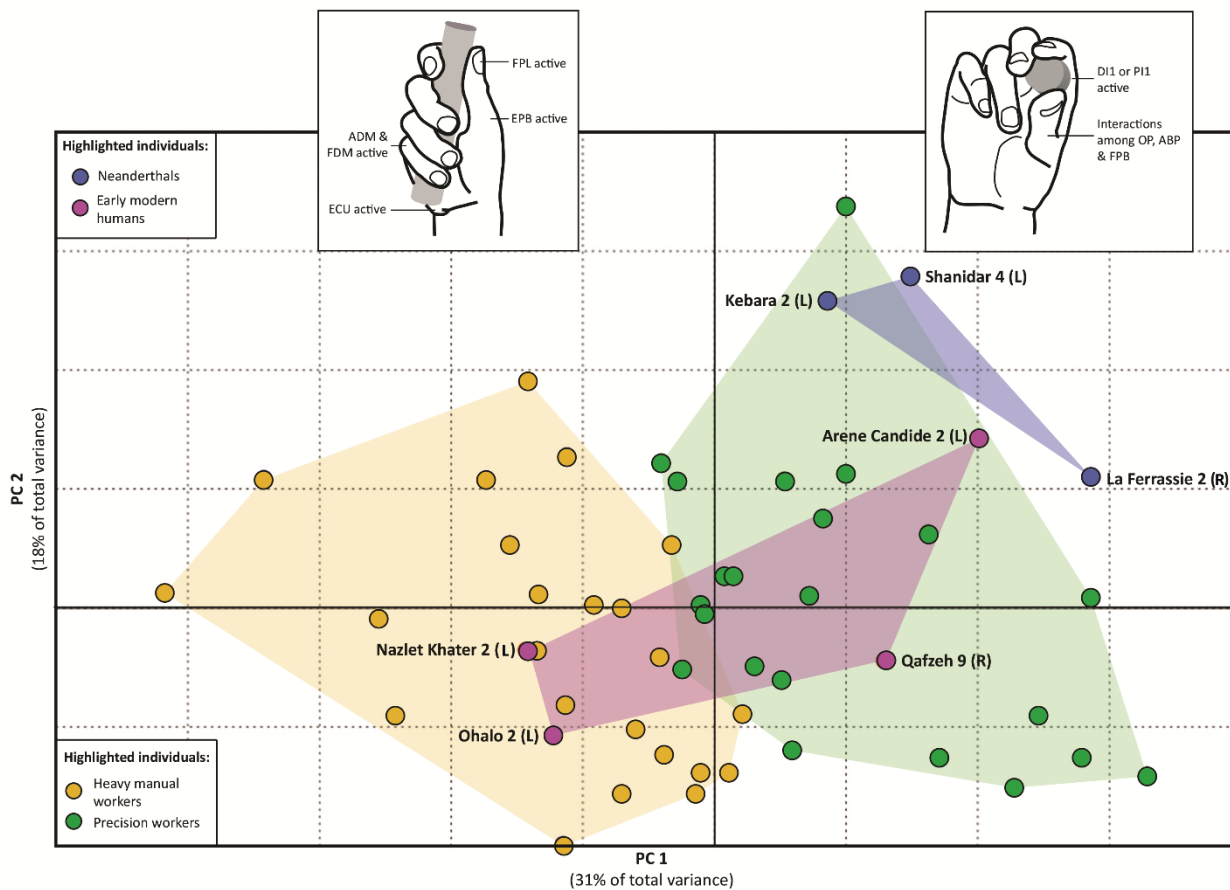

**Fig. S1. PCA using eight entheses from the same anatomical side of each fossil, either left (L) or right (R), and the right side of the reference specimens, PC1 versus PC2. The two side figures demonstrate muscle entheses with high factor loadings, which describe the two opposite enthesal patterns of PC1.**

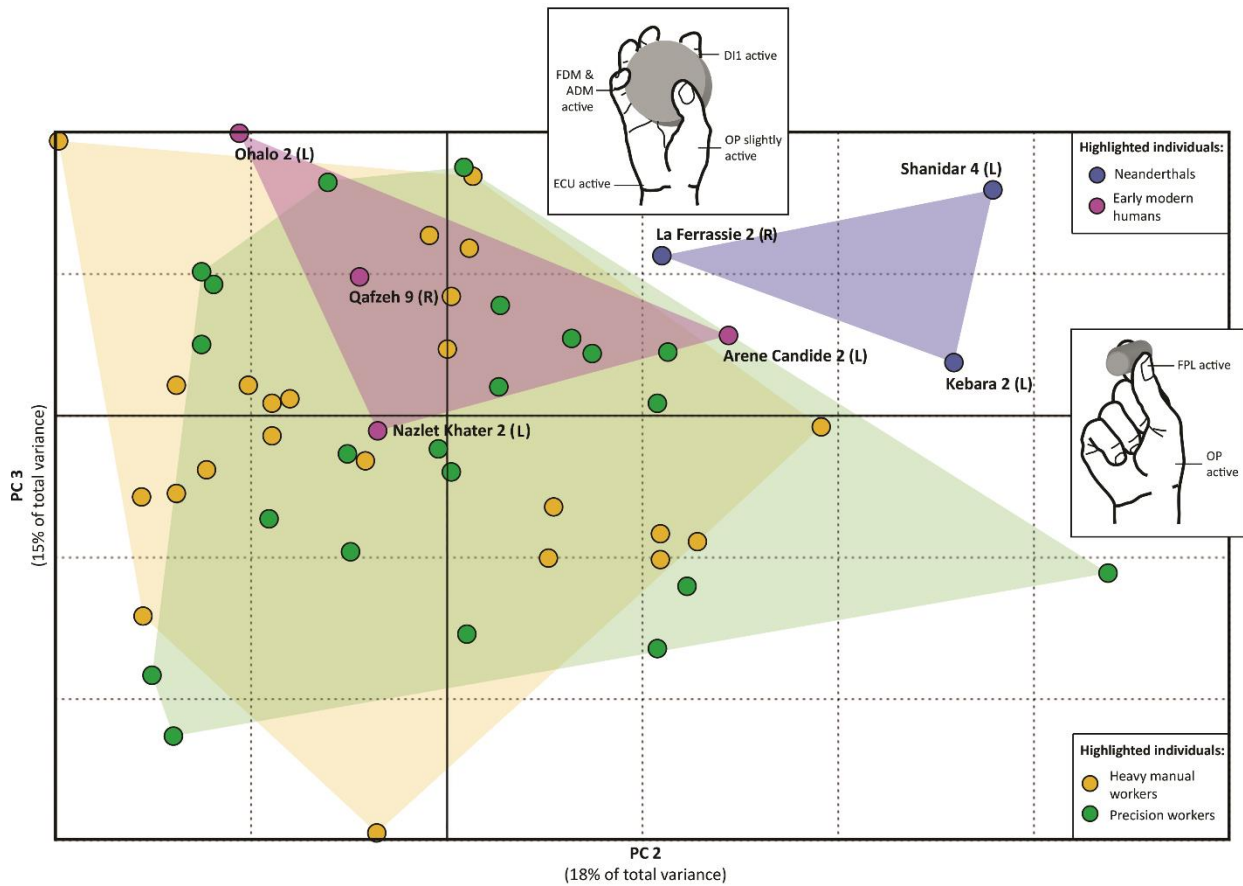

**Fig. S2.** PCA using eight entheses from the same anatomical side of each fossil, either left (L) or right (R), and the right side of the reference specimens, PC2 versus PC3. The two side figures demonstrate muscle entheses with high factor loadings, which describe the enthesal pattern separating Neanderthals from all modern humans (i.e., high values both in PC2 and PC3).

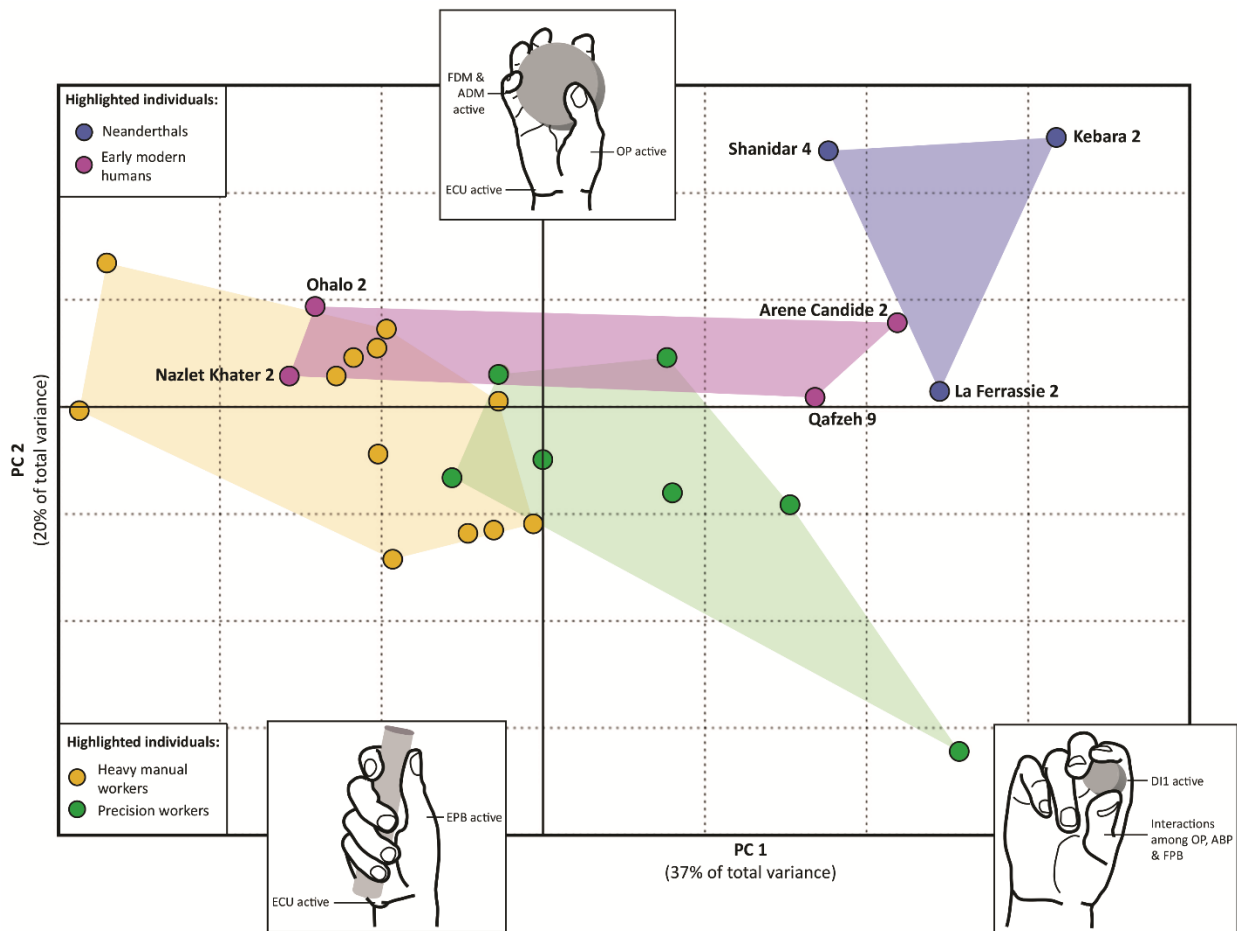

**Fig. S3. PCA using seven entheses from the same anatomical side of each fossil and the left side of the reference specimens, PC1 versus PC2.** The side figures demonstrate muscle entheses with high factor loadings, which describe the two opposite enthesal patterns of PC1 and the pattern of Neanderthals on PC3.

**Table S1. Individual hand bone sets comprising the fossil samples.** The information presented in this table for each specimen derives from the references cited in the second column.

| <b>Species</b>             | <b>Individual hand bone set</b> | <b>Sex</b> | <b>Location</b>     | <b>Date</b>          | <b>Cultural association</b> |
|----------------------------|---------------------------------|------------|---------------------|----------------------|-----------------------------|
| <b>Neanderthals</b>        | <b>Kebara 2 (56)</b>            | Male       | <b>Near East</b>    | <b>64-56 ka</b>      | Mousterian                  |
|                            | <b>La Ferrassie 1 (57)</b>      | Male       | <b>Europe</b>       | <b>45-43 ka</b>      | Mousterian                  |
|                            | <b>La Ferrassie 2 (57)</b>      | Female     | <b>Europe</b>       | <b>45-43 ka</b>      | Mousterian                  |
|                            | <b>Shanidar 3 (58)</b>          | Male       | <b>Near East</b>    | <b>75-50 ka</b>      | Mousterian                  |
|                            | <b>Shanidar 4 (58)</b>          | Male       | <b>Near East</b>    | <b>100-75 ka</b>     | Mousterian                  |
|                            | <b>Tabun 1 (59)</b>             | Female     | <b>Near East</b>    | <b>138-106 ka</b>    | Mousterian                  |
| <b>Early modern humans</b> | <b>Abri Pataud 1 (60)</b>       | Female     | <b>Europe</b>       | <b>28-26 ka</b>      | Gravettian                  |
|                            | <b>Arene Candide 2 (38)</b>     | Male       | <b>Europe</b>       | <b>11.8-10.9 ka</b>  | Epigravettian               |
|                            | <b>Dolni Vestonice 14 (61)</b>  | Male       | <b>Europe</b>       | <b>26.6 ka</b>       | Gravettian                  |
|                            | <b>Nazlet Khater 2 (35)</b>     | Male       | <b>North Africa</b> | <b>44-32 ka</b>      | Nazlet Khater 4 industry    |
|                            | <b>Ohalo 2 (62)</b>             | Male       | <b>Near East</b>    | <i>circa 19 ka</i>   | Kebaran                     |
|                            | <b>Qafzeh 9 (63)</b>            | Female     | <b>Near East</b>    | <b>130-100/92 ka</b> | Mousterian                  |

**Table S2. Descriptive statistics for the size-adjusted enthesal surface area measurements of the fossil specimens.**

| Bone                    | Measurements <sup>1,2</sup> | <u>Neanderthals</u> |                            |                    | <u>Modern humans</u> |                            |                    |
|-------------------------|-----------------------------|---------------------|----------------------------|--------------------|----------------------|----------------------------|--------------------|
|                         |                             | Mean                | Standard error of the mean | Standard Deviation | Mean                 | Standard error of the mean | Standard Deviation |
| First proximal phalanx  | ABP / FPB                   | 1.46                | 0.03                       | 0.07               | 1.39                 | 0.12                       | 0.31               |
|                         | ADP                         | 1.41                | 0.10                       | 0.24               | 1.15                 | 0.13                       | 0.31               |
|                         | EPB                         | 0.50                | 0.03                       | 0.08               | 0.73                 | 0.10                       | 0.26               |
| Second proximal phalanx | DI1                         | 1.54                | 0.11                       | 0.23               | 1.70                 | 0.09                       | 0.30               |
|                         | PI1                         | 0.92                | 0.11                       | 0.21               | 1.10                 | 0.04                       | 0.08               |
| Fifth proximal phalanx  | ADM / FDM                   | 1.25                | 0.11                       | 0.22               | 1.21                 | 0.09                       | 0.19               |
| First metacarpal        | OP                          | 1.39                | 0.11                       | 0.22               | 0.91                 | 0.08                       | 0.15               |
| Fifth metacarpal        | ECU                         | 1.61                | 0.07                       | 0.15               | 1.47                 | 0.11                       | 0.21               |
| First distal phalanx    | FPL                         | 0.55                | 0.08                       | 0.15               | 0.55                 | 0.04                       | 0.09               |

<sup>1</sup>ABP / FPB: *abductor pollicis / flexor pollicis brevis*, ADP: *adductor pollicis*, EPB: *extensor pollicis brevis*, DI1: *first dorsal interosseus*, PI1: *first palmar interosseus*, ADM / FDM: *abductor digiti minimi / flexor digiti minimi*, OP: *opponens pollicis*, ECU: *extensor carpi ulnaris*, FPL: *flexor pollicis longus*.

<sup>2</sup>Each enthesal measurement in this column is represented by the name of its corresponding muscle. In two cases, the same enthesal area is associated with two muscles (ABP / FPB and ADM / FDM).

**Table S3. Eigenvalues and factor loadings of the four PCAs on size-adjusted enthesal surface measurements.**

| Principal component analyses <sup>1</sup> | Principal component | Eigenvalue | % of variance | Factor loadings <sup>2</sup> |             |             |              |              |              |              |              |              |
|-------------------------------------------|---------------------|------------|---------------|------------------------------|-------------|-------------|--------------|--------------|--------------|--------------|--------------|--------------|
|                                           |                     |            |               | OP                           | ABP/FPB     | ADP         | EPB          | FPL          | DI1          | PI1          | ADM/FDM      | ECU          |
| 1st                                       | PC 1                | 2.51       | 31.34         | <b>0.63</b>                  | <b>0.78</b> | –           | <b>–0.67</b> | <b>–0.44</b> | <b>0.52</b>  | <b>0.39</b>  | <b>–0.31</b> | <b>–0.62</b> |
|                                           | PC 2                | 1.44       | 17.97         | <b>0.62</b>                  | 0.03        | –           | <b>–0.56</b> | <b>0.49</b>  | <b>–0.59</b> | –0.28        | 0.04         | 0.25         |
|                                           | PC 3                | 1.23       | 15.38         | 0.21                         | < 0.01      | –           | –0.11        | <b>–0.56</b> | 0.29         | <b>–0.44</b> | <b>0.65</b>  | <b>0.4</b>   |
|                                           | Total               |            | 64.69         |                              |             |             |              |              |              |              |              |              |
| 2nd                                       | PC 1                | 2.59       | 36.98         | <b>0.8</b>                   | <b>0.77</b> | –           | <b>–0.86</b> | –            | <b>0.35</b>  | 0.21         | < 0.01       | <b>–0.68</b> |
|                                           | PC 2                | 1.43       | 20.4          | <b>0.4</b>                   | –0.20       | –           | <b>–0.34</b> | –            | <b>–0.40</b> | <b>–0.40</b> | <b>0.82</b>  | <b>0.35</b>  |
|                                           | Total               |            | 57.38         |                              |             |             |              |              |              |              |              |              |
| 3rd                                       | PC 1                | 2.75       | 30.52         | <b>0.63</b>                  | <b>0.8</b>  | <b>0.57</b> | <b>–0.70</b> | <b>–0.35</b> | <b>0.44</b>  | 0.21         | <b>–0.33</b> | <b>–0.64</b> |
|                                           | PC 2                | 1.65       | 18.37         | <b>0.48</b>                  | –0.06       | <b>0.41</b> | <b>–0.45</b> | <b>0.51</b>  | <b>–0.63</b> | <b>–0.52</b> | 0.16         | 0.28         |
|                                           | PC 3                | 1.34       | 14.87         | 0.19                         | < 0.01      | –0.10       | –0.16        | <b>–0.63</b> | <b>0.33</b>  | <b>–0.38</b> | <b>0.7</b>   | <b>0.35</b>  |
|                                           | Total               |            | 63.76         |                              |             |             |              |              |              |              |              |              |
| 4th                                       | PC 1                | 2.17       | 72.26         | –                            | <b>0.73</b> | <b>0.82</b> | <b>–0.98</b> | –            | –            | –            | –            | –            |
|                                           | Total               |            | 72.26         |                              |             |             |              |              |              |              |              |              |

<sup>1</sup>1st: eight entheses, same anatomical side of each fossil, right side of the comparative sample;

2nd: seven entheses, same anatomical side of each fossil, left side of the comparative sample; 3rd:

all nine entheses, mixed sides fossil dataset, right side of the comparative sample (best preserved);

4th: three entheses from the same anatomical side of each fossil, right side of the comparative sample.

<sup>2</sup>Factor loadings over 0.30 (51) are in bold.

**Table S4. Statistics of the two discriminant function analyses.**

| Discriminant function analyses                    | Precision-grip group accuracy (original / cross-validated) | Power-grip group accuracy (original / cross-validated) | Group centroids (precision / power groups) | Unstandardized coefficients |                       |                       | Constant |
|---------------------------------------------------|------------------------------------------------------------|--------------------------------------------------------|--------------------------------------------|-----------------------------|-----------------------|-----------------------|----------|
|                                                   |                                                            |                                                        |                                            | Principal component 1       | Principal component 2 | Principal component 3 |          |
| <b>1st (mixed-sides dataset of nine entheses)</b> | 95.5% / 90.9%                                              | 95.7% / 95.7%                                          | - 1.28 / 1.33                              | 1.7                         | 0.58                  | 0.312                 | 0.28     |
| <b>2nd (dataset of three entheses)</b>            | 91.3% / 91.3%                                              | 100% / 100%                                            | - 1.10 / 1.15                              | 1.79                        | -                     | -                     | 0.41     |
